# Supplementary material for: Schizophrenia-Related Disability in China: Prevalence, Gender, and Geographic Location
Source: Atypon-hosted journal article supplement (doi:10.1176/appi.ps.201400032), 2014-12-17
Supplement: appi.ps.201400032.ds001.pdf [file appi.ps.201400032.ds001.pdf]

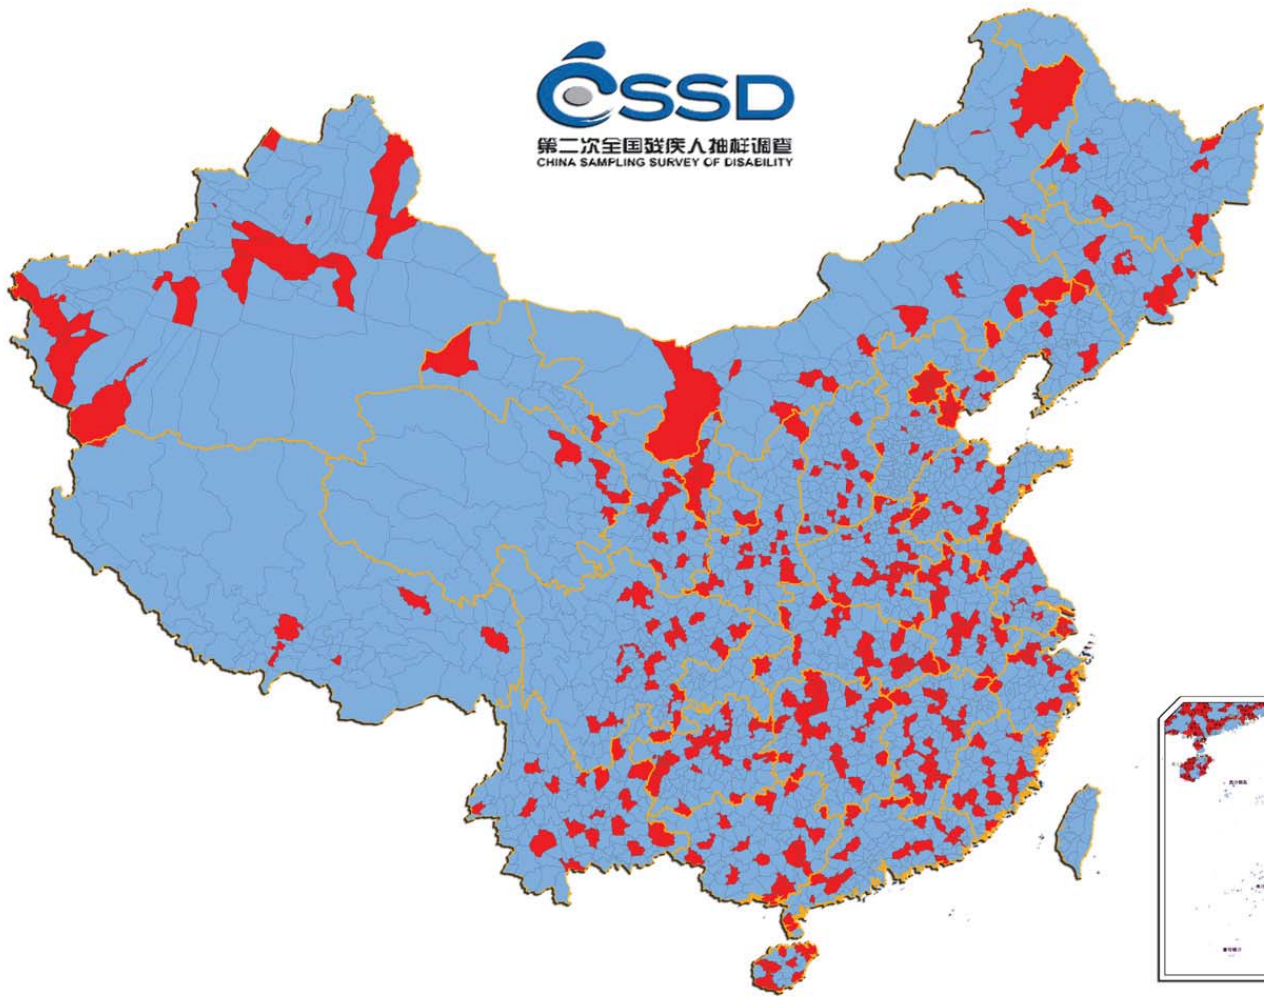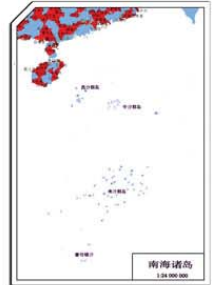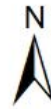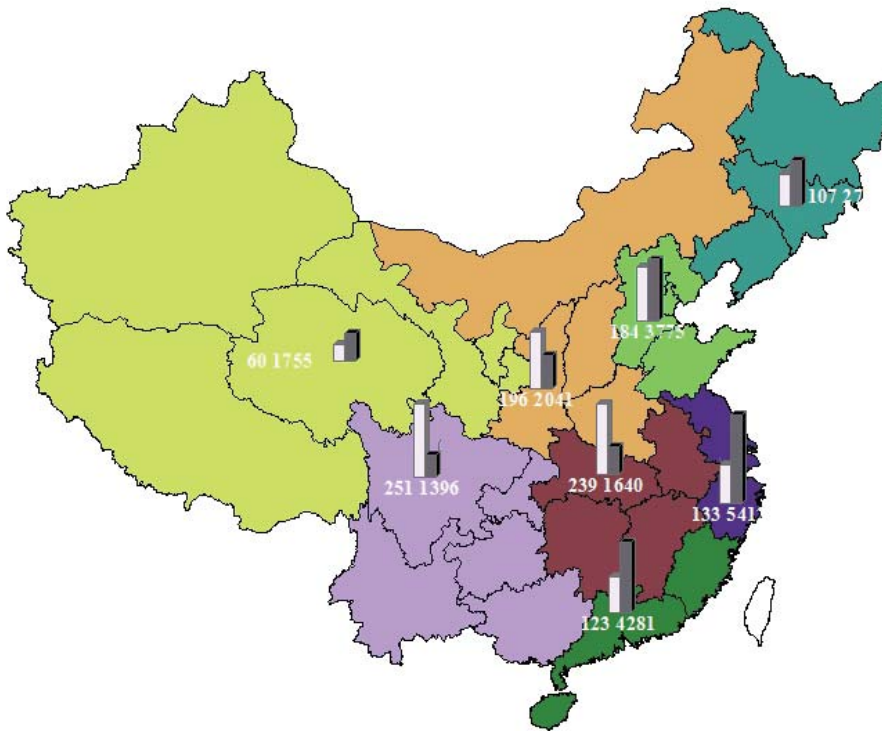

**Legend**

**Different Colors-  
Different Regions**

-  East Coast
-  North Coast
-  North East
-  North West
-  South Coast
-  South West
-  Yangtze River
-  Yellow River
-  Population Number (Million)
-  GDP Per Capita (U.S. Dollars)
